# Supplementary material for: Implementation of a Standardized Premedication Bundle to Improve Procedure Success for Nonemergent Neonatal Intubations
Source: PubMed Central journal article supplement — Pediatr Qual Saf. 2022 Dec 27;8(1):e622. doi: 10.1097/pq9.0000000000000622 (PMC9799173; doi:10.1097/pq9.0000000000000622), 2022-12-27
Supplement: pqs-8-e622-s001.pdf [file pqs-8-e622-s001.pdf]

**Supplemental Table 1:** Summary of period 1, 2 and 3 study interventions, including educational interventions in period 2 and Plan-Do-Study-Act (PDSA) cycle interventions in period 3.

| <b>Study Intervention Timeline</b>                                                                                                                                                                                               |                                                                                                                                                                    |                                                                     |                                    |
|----------------------------------------------------------------------------------------------------------------------------------------------------------------------------------------------------------------------------------|--------------------------------------------------------------------------------------------------------------------------------------------------------------------|---------------------------------------------------------------------|------------------------------------|
| <b>Study Period</b>                                                                                                                                                                                                              | <b>Baseline Data Collection</b>                                                                                                                                    |                                                                     | <b>Implementation Date</b>         |
| Period 1                                                                                                                                                                                                                         | Retrospective chart review                                                                                                                                         |                                                                     | May 1st, 2019 - January 28th, 2020 |
| <b>Study Period</b>                                                                                                                                                                                                              | <b>Educational Interventions</b>                                                                                                                                   |                                                                     | <b>Implementation Date</b>         |
| Period 2                                                                                                                                                                                                                         | Provider Lecture-Based Education                                                                                                                                   |                                                                     | January 28th, 2020                 |
|                                                                                                                                                                                                                                  | Multi-disciplinary workgroup formed with representation from bedside nursing staff, nurse management leadership, RT, pharmacy and providers (NNPs, PAs and MD/DOs) |                                                                     | May 20th, 2020                     |
|                                                                                                                                                                                                                                  | MUSC Pre-Medication for Non-Emergent Intubation Protocol received consensus-based clinical guideline approval by the Division of Neonatology                       |                                                                     | July 1st, 2020                     |
|                                                                                                                                                                                                                                  | Fellow Lecture-Based Education Session                                                                                                                             |                                                                     | July 10th, 2020                    |
|                                                                                                                                                                                                                                  | Educational video released through a secure video-streaming service (Panopto) to all bedside nursing staff and incorporated into new hire nursing orientation      |                                                                     | July 31st, 2020                    |
|                                                                                                                                                                                                                                  | Printed protocols placed in NICU provider work rooms and intubation procedure carts                                                                                |                                                                     | August 5th, 2020                   |
| <b>MUSC Premedication for Non-Emergent Intubation Protocol Released on August 6th, 2020</b>                                                                                                                                      |                                                                                                                                                                    |                                                                     |                                    |
| <b>Study Period</b>                                                                                                                                                                                                              | <b>Targeted Gap</b>                                                                                                                                                | <b>PDSA Change Idea Intervention</b>                                | <b>Implementation Date</b>         |
| Period 3                                                                                                                                                                                                                         | Low RN video view rate                                                                                                                                             | RN email alert and staff meeting reminder to view video             | October 1st, 2020                  |
|                                                                                                                                                                                                                                  | Small NMBA dose volume                                                                                                                                             | 1:10 rocuronium dilution dose for infants <1 kilogram               | January 23rd, 2021                 |
|                                                                                                                                                                                                                                  | Monthly resident turnover                                                                                                                                          | Lecture-based education incorporated into monthly resident teaching | April 8th, 2021                    |
| Abbreviations: NNP, Neonatal Nurse Practitioner; PA, Physician Assistant; MD, Medical Doctor; DO, Doctor of Osteopathic Medicine; RT, Respiratory Therapist; MUSC, Medical University of South Carolina; PDSA, Plan-Do-Study-Act |                                                                                                                                                                    |                                                                     |                                    |
