# Supplementary material for: Implementation of a Standardized Premedication Bundle to Improve Procedure Success for Nonemergent Neonatal Intubations
Source: PubMed Central journal article supplement — Pediatr Qual Saf. 2022 Dec 27;8(1):e622. doi: 10.1097/pq9.0000000000000622 (PMC9799173; doi:10.1097/pq9.0000000000000622), 2022-12-27
Supplement: pqs-8-e622-s002.pdf [file pqs-8-e622-s002.pdf]

**Supplemental Table 2:** Non-severe, severe and rare adverse events for the 9-month baseline (Period 1) and 12-month study intervention period (Period 3).

| <b>Adverse Events</b>                                            |                         |                         |                 |
|------------------------------------------------------------------|-------------------------|-------------------------|-----------------|
|                                                                  | <b>Period 1 (n=158)</b> | <b>Period 3 (n=216)</b> | <b>p Value</b>  |
| <b>Non-Severe Adverse Events, n (%)</b>                          | <b>48 (30)</b>          | <b>98 (45)</b>          | <b>&lt;0.01</b> |
| Bradycardia <100 bpm                                             | 12 (8)                  | 7 (3)                   | 0.06            |
| Tachycardia >180 bpm                                             | 0 (0)                   | 10 (5)                  | <0.01           |
| Desaturation <88% SpO2                                           | 10 (6)                  | 65 (30)                 | <0.01           |
| Esophageal intubation with immediate identification              | 7 (4)                   | 4 (2)                   | 0.15            |
| Oral or airway bleeding                                          | 6 (4)                   | 5 (2)                   | 0.40            |
| Difficult bag-mask ventilation                                   | 8 (5)                   | 3 (1)                   | 0.04            |
| Emesis                                                           | 5 (3)                   | 4 (2)                   | 0.41            |
| <b>Severe Adverse Events, n (%)</b>                              | <b>30 (19)</b>          | <b>40 (19)</b>          | <b>0.91</b>     |
| Severe bradycardia <60 bpm                                       | 2 (1)                   | 3 (1)                   | 0.92            |
| Severe desaturation >20% from SpO2 baseline                      | 3 (2)                   | 28 (13)                 | <0.01           |
| Esophageal intubation with delayed identification                | 1 (1)                   | 1 (1)                   | 0.82            |
| Chest wall rigidity                                              | 7 (4)                   | 6 (3)                   | 0.39            |
| Direct airway trauma                                             | 13 (8)                  | 0 (0)                   | <0.01           |
| Transition to emergent                                           | 4 (3)                   | 2 (1)                   | 0.22            |
| <b>Rare Adverse Events, n (%)</b>                                | <b>1 (0)</b>            | <b>1 (0)</b>            | <b>0.82</b>     |
| Hypotension requiring intervention                               | 0 (0)                   | 0 (0)                   | –               |
| Chest compressions                                               | 0 (0)                   | 1 (100)                 | 0.39            |
| Code medications                                                 | 0 (0)                   | 0 (0)                   | –               |
| Pneumothorax                                                     | 1 (100)                 | 0 (0)                   | 0.24            |
| Death                                                            | 0 (0)                   | 0 (0)                   | –               |
| <b>Procedural Events, n (%)</b>                                  | <b>19 (12)</b>          | <b>30 (14)</b>          | <b>0.60</b>     |
| Unable to extubate if planned                                    | 5 (3)                   | 10 (5)                  | 0.48            |
| Tube dislodged before/during taping requiring additional attempt | 4 (3)                   | 9 (4)                   | 0.39            |
| Pain/agitation requiring additional medications                  | 6 (4)                   | 9 (4)                   | 0.86            |
| Equipment failure                                                | 0 (0)                   | 2 (1)                   | 0.23            |
| Needed equipment not at bedside                                  | 4 (3)                   | 0 (0)                   | 0.02            |
| Abbreviations: BPM, Beats Per Minute; SpO2, Oxygen Saturation    |                         |                         |                 |
